# Supplementary material for: A Participatory Assessment of Perceived Neighbourhood Walkability in a Small Urban Environment
Source: MDPI journal article supplement (doi:10.3390/su14010206), 2021-12-26

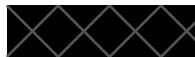

## Questionnaire concernant la marchabilité en Bruxelles

### Vragenlijst met betrekking tot de bewandelbaarheid in Brussel

Ce questionnaire sert à une recherche réalisée dans le contexte du CIEM (Centre Interuniversitaire d'Etude de la Mobilité). Le CIEM vous remercie pour votre participation et garanti que vos données sont complètement anonymes. Votre avis personnel est important afin d'être capable de formuler des recommandations pointues. Il n'y a pas des bonnes ou mauvaises réponses, donc veuillez indiquer votre propre perception. Avant d'aborder les questions concernant la marchabilité nous posons quelques questions vous concernant.

*Deze vragenlijst kadert zich binnen een onderzoek dat gerealiseerd wordt binnen de context van het interuniversitair centrum rond mobiliteitsstudies (CIEM). Het CIEM dankt u voor uw medewerking en garandeert dat uw gegevens volledig anoniem zullen behandeld worden. Uw persoonlijk oordeel is belangrijk om in staat te zijn doelgerichte aanbevelingen te formuleren. Er zijn geen goede of slechte antwoorden, gelieve dus uw persoonlijke perceptie aan te geven. Alvorens de vragen met betrekking de bewandelbaarheid te stellen, verzoeken we u enkele gegevens met betrekking uzelf te verstrekken.*

### Partie 1 : Données Sociodémographiques / Deel 1: Socio-demografische gegevens

1. Age/Leeftijd : \_\_\_\_\_ ans/jaar
2. Sexe/Geslacht: ☐ Homme/Man ☐ Femme/vrouw
3. Niveau d'étude/Studieniveau:
 

|                                                              |                                                                                       |
|--------------------------------------------------------------|---------------------------------------------------------------------------------------|
| <input type="radio"/> Aucun diplôme / Geen diploma           | <input type="radio"/> Supérieur non-universitaire / Hoger niet-universitair onderwijs |
| <input type="radio"/> Ecole primaire / Lager onderwijs       |                                                                                       |
| <input type="radio"/> Ecole secondaire / Secondair onderwijs | <input type="radio"/> Supérieur (post-)universitaire / Hoger (post-)universitair      |
4. Est-ce que vous connaissez l'adresse/nom de la rue/nom du quartier où vous vous trouvez pour l'instant ?  
Kent u het adres/de naam van de straat/de naam van de buurt waar u zich op dit moment bevindt?  

|                                |                                                           |
|--------------------------------|-----------------------------------------------------------|
| <input type="radio"/> Non/Neen |                                                           |
| <input type="radio"/> Oui/Ja   | Adresse/Rue/Quartier : _____<br>Adres/Straat/Buurt: _____ |
5. En moyenne combien de fois visitez-vous cet endroit et quel mode de déplacement est-ce vous utilisez typiquement pour arriver à cet endroit ?  
*Hoe vaak komt u op deze plaats gemiddeld gezien, en welke vervoersmiddel gebruikt u normalerwijze om naar hier te komen?*

| Fréquence/Frequentie                                                                          | Mode de déplacement/vervoersmiddel                                                      |
|-----------------------------------------------------------------------------------------------|-----------------------------------------------------------------------------------------|
| <input type="radio"/> Rare de fois/zeldzaam geval                                             | <input type="radio"/> Marche/Te voet                                                    |
| <input type="radio"/> Un à quelques jours par an/<br><i>Een of enkele dagen per jaar</i>      | <input type="radio"/> Vélo/Fiets                                                        |
| <input type="radio"/> Un à quelques jours par mois/<br><i>Een of enkele dagen per maand</i>   | <input type="radio"/> Cyclomoteur, moto/Bromfiets,                                      |
| <input type="radio"/> Un à quelques jours par semaines<br><i>Een of enkele dagen per week</i> | <input type="radio"/> Transport public/Openbaar vervoer                                 |
|                                                                                               | <input type="radio"/> Voiture (en tant que conducteur)/<br><i>Auto (als bestuurder)</i> |

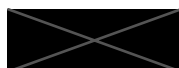

☐ Au moins 4 jours par semaines  
*Minstens 4 dagen per week*

☐ Voiture (en tant que passager) /  
*Auto (alspassagier)*

☐ Autre/*Andere*

**Partie 2 : Perception sur la marchabilité / Deel 2: Perceptie aangaande de bewandelbaarheid**

6. Donnez une note globale (sur 10) qui indique jusqu'à quelle degré cet endroit incite à la marche (0 la plus mauvaise note, 10 la meilleure).

*Geef een algemene score (op 10) die aangeeft in welke mate deze locatie uitnodigt om hier te wandelen (0 de slechtste score, 10 de beste).*

\_\_\_\_\_ / 10

7. Évaluez, sur une échelle de 1 (très mauvais) jusqu'à 5 (très-bien), l'endroit où vous vous trouvez concernant les dimensions suivantes.

*Evalueer, op een schaal van 1 (zeer slecht) tot 5 (zeer goed), de locatie waar u zich nu bevindt betreffende de volgende dimensies.*

| Dimensions/ <i>Dimensie</i>                                             | Items/ <i>Items</i>                                                                                                                                                                                                                               | Très mauvais/<br><i>Zeer slecht</i><br>(1) |                       |                       |                       |                       | Très bien/<br><i>Zeer goed</i><br>(5) |
|-------------------------------------------------------------------------|---------------------------------------------------------------------------------------------------------------------------------------------------------------------------------------------------------------------------------------------------|--------------------------------------------|-----------------------|-----------------------|-----------------------|-----------------------|---------------------------------------|
| Sensation de propreté/<br><i>Gevoel van properheid</i>                  | Déchets au sol/ <i>Afval op de grond</i><br>Voirie dégradée/ <i>Aangetaste weg</i><br>Odeurs / <i>Stank</i>                                                                                                                                       | <input type="radio"/>                      | <input type="radio"/> | <input type="radio"/> | <input type="radio"/> | <input type="radio"/> | <input type="radio"/>                 |
| Esthétique visuelle/<br><i>Visuele esthetiek</i>                        | Vue d'ensemble/(Uit-)zicht<br>Couleurs/ <i>Kleuren</i><br>Beauté/ <i>Schoonheid</i><br>Architecture remarquable/<br><i>Opmerkelijke architectuur</i><br>Espaces ouverts/ <i>Open ruimtes</i>                                                      | <input type="radio"/>                      | <input type="radio"/> | <input type="radio"/> | <input type="radio"/> | <input type="radio"/> | <input type="radio"/>                 |
| Valeur paysagère et naturelle/<br><i>Waarde van landschap en natuur</i> | Présence de verdure/<br><i>Aanwezigheid van groen</i><br>Présence d'eau/ <i>Aanwezigheid van water</i><br>Panorama/ <i>Panorama</i><br>Bruit/ <i>Lawaai</i><br>Présence de jeux d'enfants/<br><i>Aanwezigheid van kinderspellen</i>               | <input type="radio"/>                      | <input type="radio"/> | <input type="radio"/> | <input type="radio"/> | <input type="radio"/> | <input type="radio"/>                 |
| Sentiment de pression/<br><i>Gevoel van drukte</i>                      | Densité bâtie/ <i>Bouwdichtheid</i><br>Sites industriels/ <i>Industriële sites</i><br>Monotonie/ <i>Eentonigheid</i><br>Discontinuité des paysages/<br><i>Onderbrekingen in het landschap</i><br>Insécurité routière/ <i>Verkeersonveiligheid</i> | <input type="radio"/>                      | <input type="radio"/> | <input type="radio"/> | <input type="radio"/> | <input type="radio"/> | <input type="radio"/>                 |
| Sentiment de (in)sécurité/<br><i>Gevoel van(on)veiligheid</i>           | Perception des lieux/<br><i>Perceptie van de omgeving</i><br>Niveaux de trafic routier/ $\mu$                                                                                                                                                     | <input type="radio"/>                      | <input type="radio"/> | <input type="radio"/> | <input type="radio"/> | <input type="radio"/> | <input type="radio"/>                 |

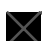

|  |                                                      |  |   |   |   |   |
|--|------------------------------------------------------|--|---|---|---|---|
|  | <i>Hoeveelheid verkeer</i>                           |  |   |   |   |   |
|  | <i>Éclairage/Verlichting</i>                         |  | ○ | ○ | ○ | ○ |
|  | <i>Mouvements suspects/<br/>Verdachte bewegingen</i> |  | ○ | ○ | ○ | ○ |

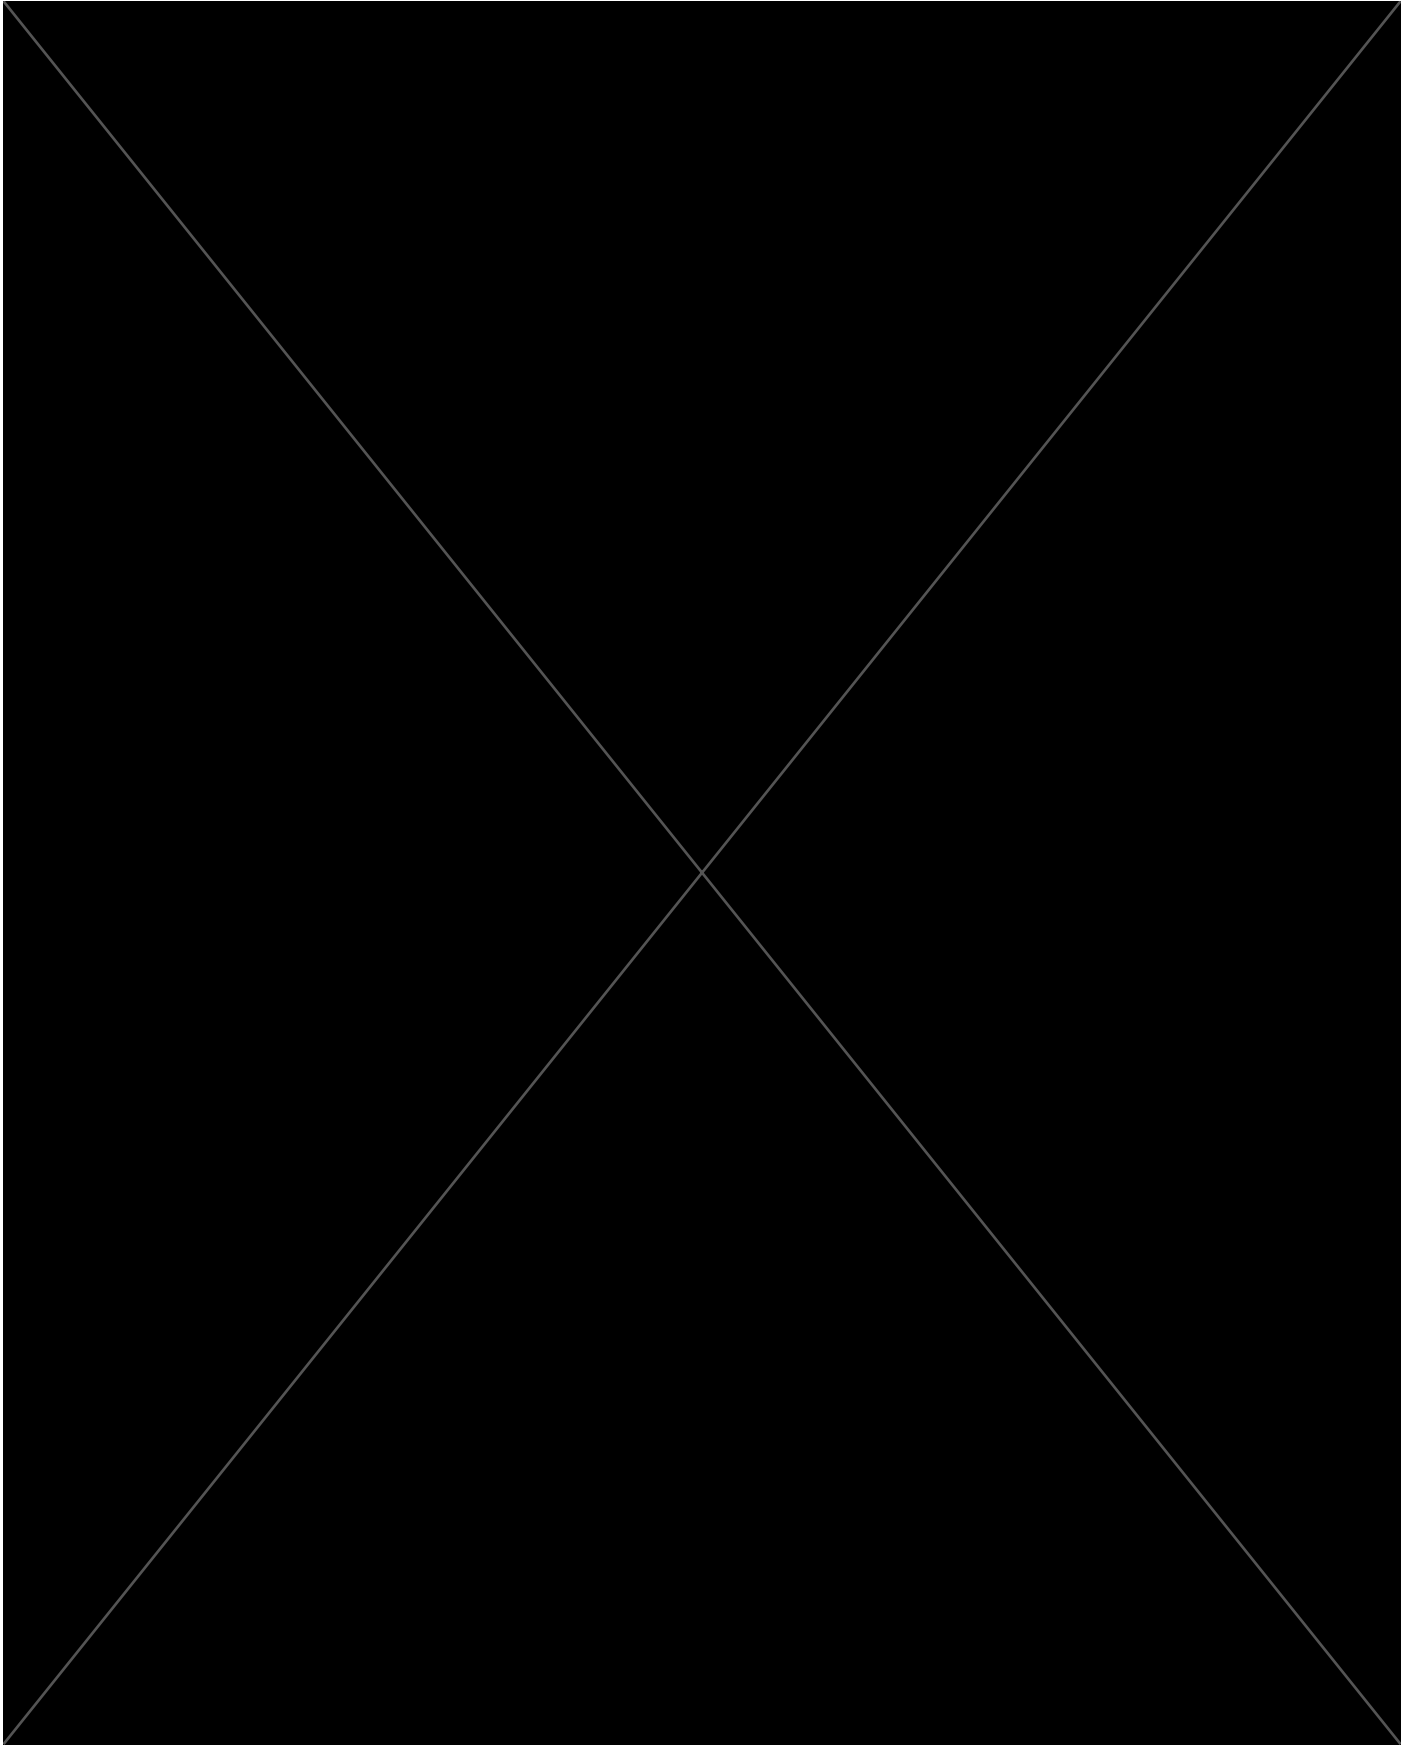

Supplement: s1 [file s1]
